# Supplementary material for: Off-label use of ceftiofur in one-day chicks triggers a short-term increase of ESBL-producing E. coli in the gut
Source: PubMed Central journal article supplement (PMC6133352; doi:10.1371/journal.pone.0203158), 2018-09-11

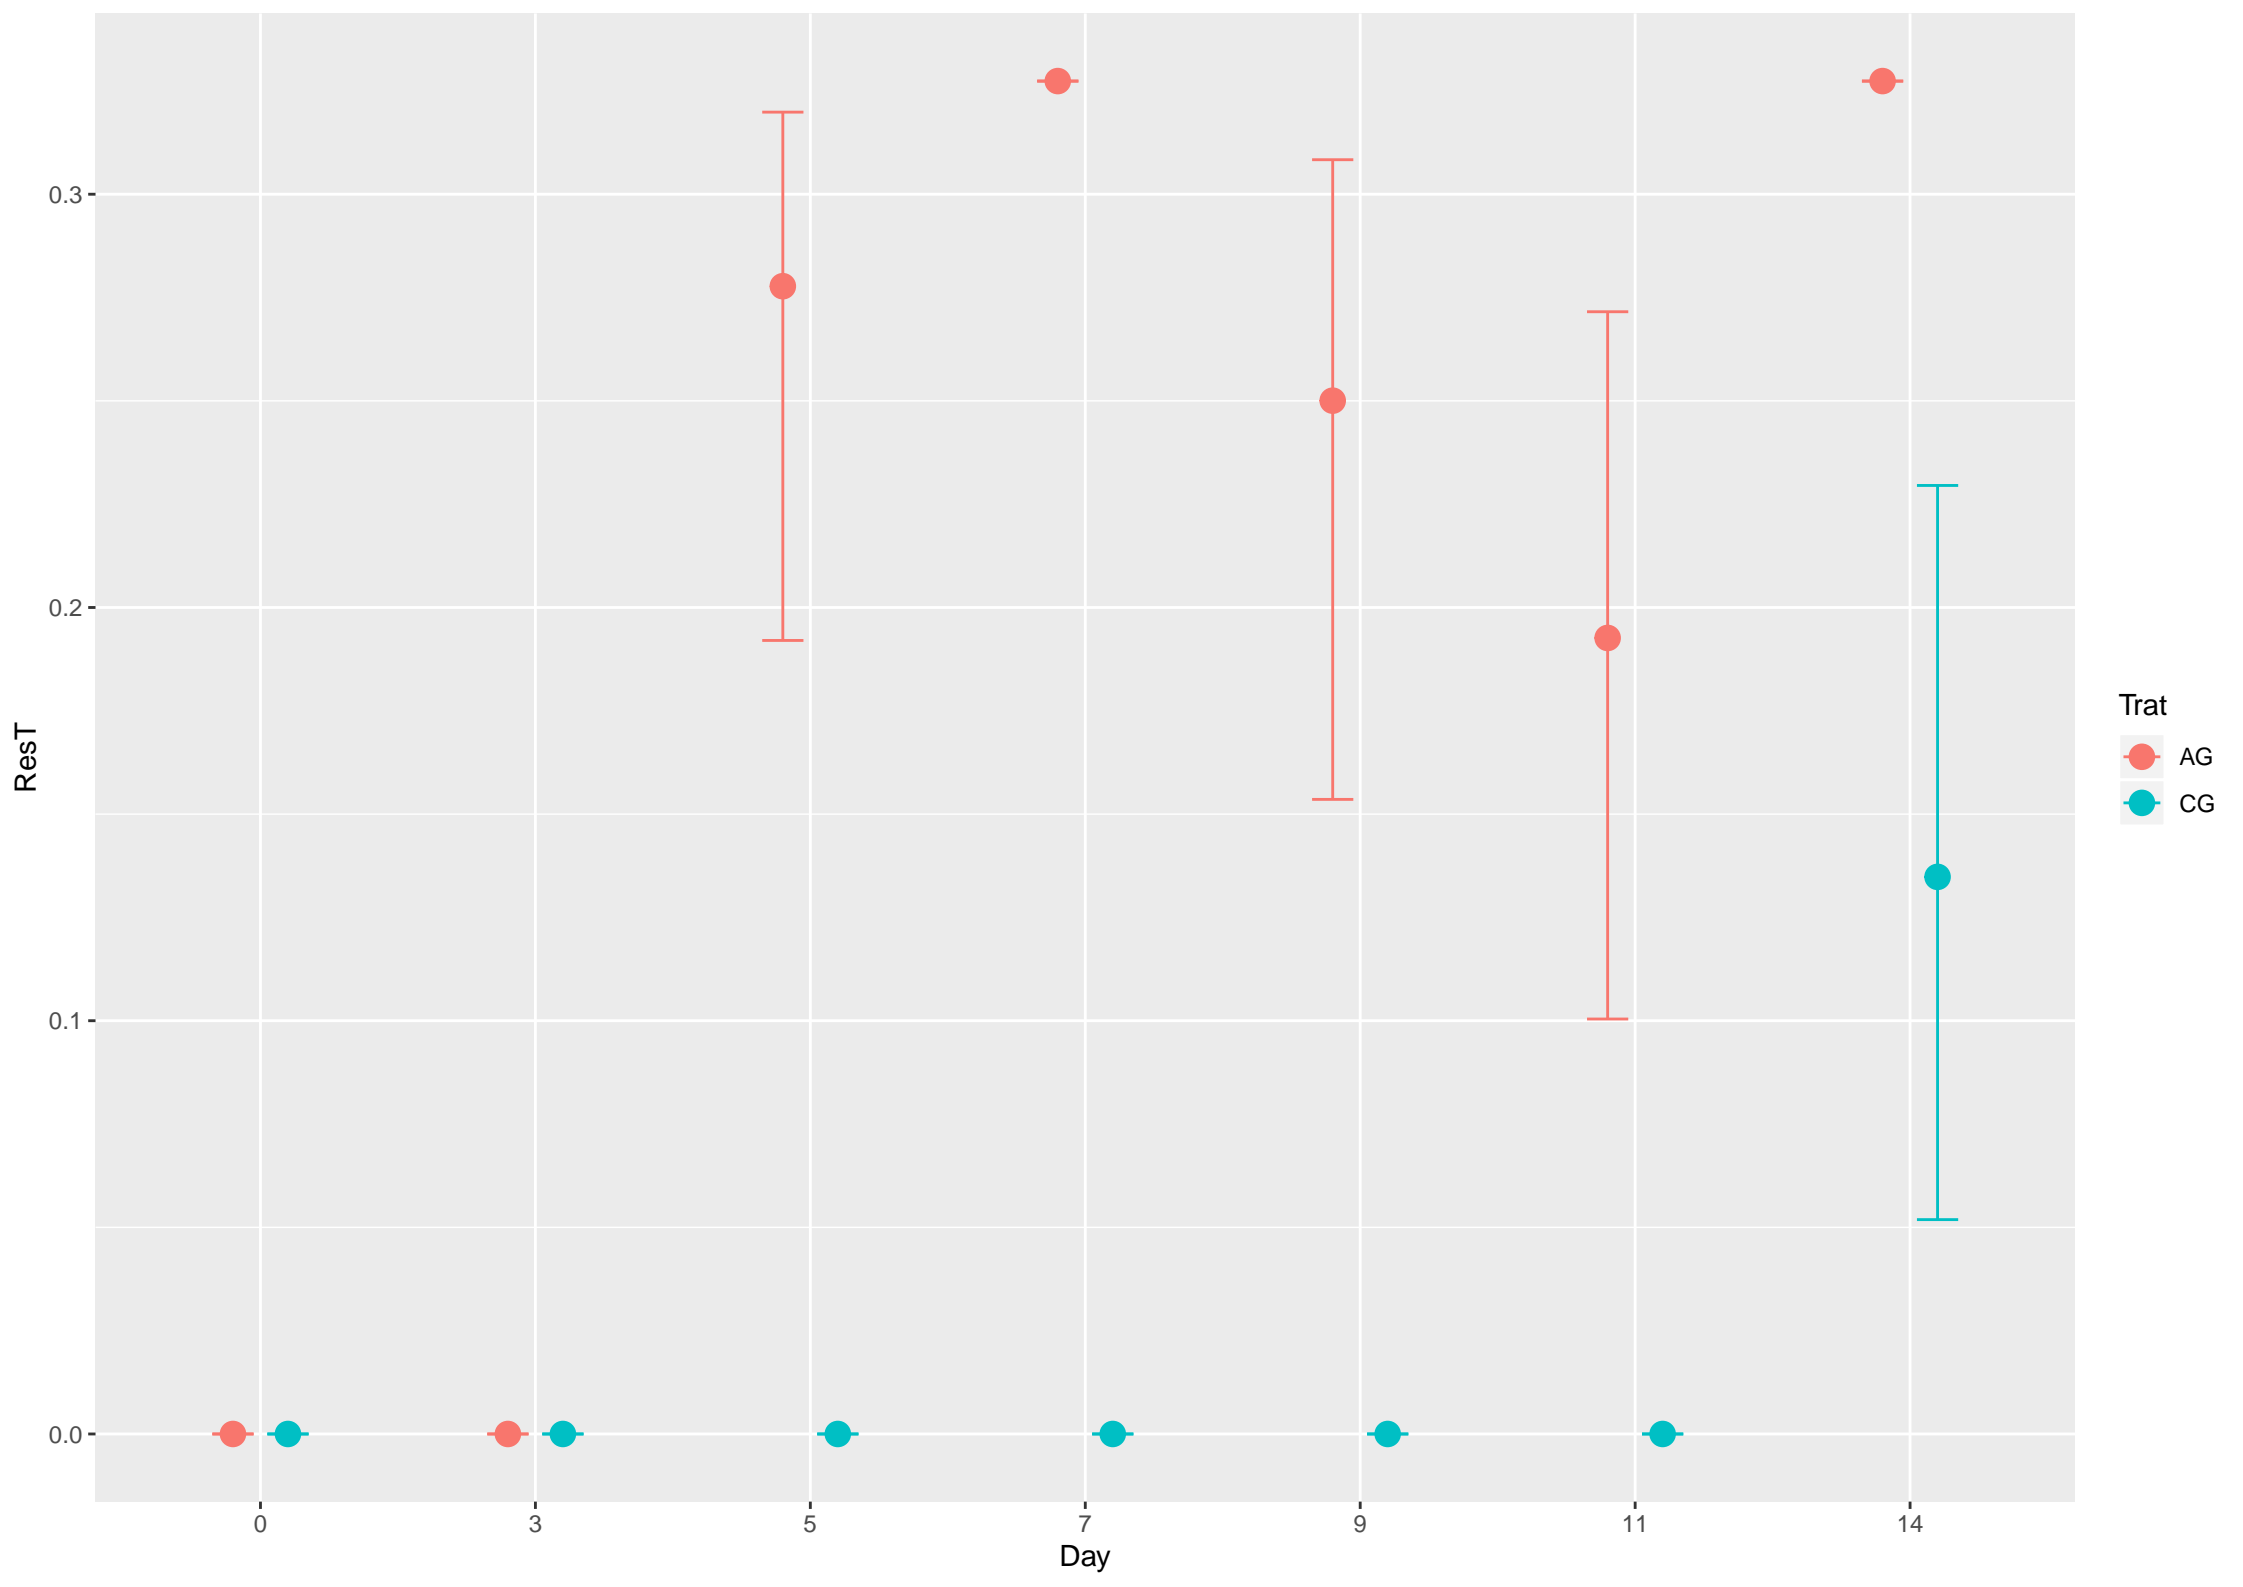

Supplement: pone.0203158.s005.pdf [file pone.0203158.s005.pdf]
